# Supplementary material for: IGF-I induces senescence of hepatic stellate cells and limits fibrosis in a p53-dependent manner
Source: PubMed Central journal article supplement (PMC5056388; doi:10.1038/srep34605), 2016-10-10
Supplement: srep34605-s1.pdf [file srep34605-s1.pdf]

**IGF-I induces senescence of hepatic stellate cells and limits fibrosis in a p53-  
dependent manner.**

Hitoshi Nishizawa<sup>2</sup>, Genzo Iguchi<sup>2</sup>, Hidenori Fukuoka<sup>2</sup>, Michiko Takahashi<sup>3</sup>,  
Kentaro Suda<sup>1</sup>, Hironori Bando<sup>1</sup>, Ryusaku Matsumoto<sup>1</sup>, Kenichi Yoshida<sup>1</sup>, Yukiko  
Odake<sup>1</sup>, Wataru Ogawa<sup>1</sup>, Yutaka Takahashi<sup>1\*</sup>

<sup>1</sup>Division of Diabetes and Endocrinology, Department of Internal Medicine,  
Kobe University Graduate School of Medicine, Kobe, Japan

<sup>2</sup>Division of Diabetes and Endocrinology, Kobe University Hospital, Japan <sup>3</sup>Department  
of Nutrition, Kobe University Hospital, Japan

# Supplementary Table 1

## RT-PCR Primers for Analysis

| Gene                  | Organism | Direction | Sequence                  |
|-----------------------|----------|-----------|---------------------------|
| <i>Cd68</i>           | mouse    | Forward   | GACACTTCGGGCCATGTT        |
|                       |          | Reverse   | GAGGAGGACCAGGCCAAT        |
| <i>F4/80</i>          | mouse    | Forward   | GGAGGACTTCTCCAAGCCTATT    |
|                       |          | Reverse   | AGGCCTCTCAGACTTCTGCTT     |
| <i>Tnfa</i>           | mouse    | Forward   | CCGATGGGTTGTACCTTGTC      |
|                       |          | Reverse   | CGGACTCCGCAAAGTCTAAG      |
| <i>Tgfb</i>           | mouse    | Forward   | TTGCCCTCTACAACCAACACAA    |
|                       |          | Reverse   | GGCTTGCGACCCACGTAGTA      |
| <i>Il-1β</i>          | mouse    | Forward   | TTGACGGACCCAAAAGAT        |
|                       |          | Reverse   | GAAGCTGGATGCTCTCATCTG     |
| <i>Il-6</i>           | mouse    | Forward   | GCTACCAAAGTGGATATAATCAGGA |
|                       |          | Reverse   | CCAGGTAGCTATGGTACTCCAGAA  |
| <i>Procollagen1a1</i> | mouse    | Forward   | GAGCGGAGAGTACTGGATCG      |
|                       |          | Reverse   | GTTCCGGCTGATGTACCAGT      |
| <i>Collagen3a1</i>    | mouse    | Forward   | TCCCCTGGAATCTGTGAATC      |
|                       |          | Reverse   | TGAGTCGAATTGGGGAGAAT      |
| <i>Collagen4a1</i>    | mouse    | Forward   | TTAAAGGACTCCAGGGACCAC     |
|                       |          | Reverse   | CCCCTGAGCCTGTCCACAC       |
| <i>Mmp3</i>           | mouse    | Forward   | TTGTTCTTTGATGCAGTCAGC     |
|                       |          | Reverse   | GATTTGCGCCAAAAGTGC        |
| <i>Mmp9</i>           | mouse    | Forward   | ACGACATAGACGGCATCCA       |
|                       |          | Reverse   | GCTGTGGTTCAGTTGTGGTG      |
| <i>Timp1</i>          | mouse    | Forward   | ATTCAAGGCTGTGGGAAATG      |
|                       |          | Reverse   | CTCAGAGTACGCCAGGGAAC      |
| <i>Cox3</i>           | mouse    | Forward   | GCAGGATTCTTCTGAGCGTTCT    |
|                       |          | Reverse   | GTCAGCAGCCTCCTAGATCATGT   |
| <i>Cyt c</i>          | mouse    | Forward   | GCAAGCATAAGACTGGACCAA     |
|                       |          | Reverse   | TTGTTGGCATCTGTGTAAGAGAATC |
| <i>Nrf2</i>           | mouse    | Forward   | CCAGAAGCCACACTGACAGA      |
|                       |          | Reverse   | GGAGAGGATGCTGCTGAAAG      |
| <i>Sco2</i>           | mouse    | Forward   | ATCGCACAGCCCTAAGTCTC      |
|                       |          | Reverse   | CAGTAGCATCGTGGACCTGA      |
| <i>αsma</i>           | mouse    | Forward   | AAACAGGAATACGACGAAG       |
|                       |          | Reverse   | CAGGAATGATTTGGAAAGGA      |
| <i>Vimentin</i>       | mouse    | Forward   | CCAACCTTTTCTTCCCTGAA      |
|                       |          | Reverse   | TGAGTGGGTGTCAACCAGAG      |
| <i>Fibronectin</i>    | mouse    | Forward   | CGGAGAGAGTGCCCTACTA       |
|                       |          | Reverse   | CGATATTGGTGAATCGCAGA      |
| <i>p21</i>            | mouse    | Forward   | AACATCTCAGGGCCGAAA        |
|                       |          | Reverse   | TGCGCTTGGAGTGATAGAAA      |
| <i>18s</i>            | mouse    | Forward   | TCAAGAACGAAAGTCGGAGG      |
|                       |          | Reverse   | GGACATCTAAGGGCATCACA      |
| <i>Gapdh</i>          | mouse    | Forward   | AGCTTGTCAACCGGAAG         |
|                       |          | Reverse   | TTTGATGTTAGTGGGTCTCG      |
| <i>αsma</i>           | rat      | Forward   | TCCCAAGCTGTGTCTCTG        |
|                       |          | Reverse   | GTGCCACGTTATGATGATGC      |
| <i>Vimentin</i>       | rat      | Forward   | CTCACCTCGGAAGTGGATG       |
|                       |          | Reverse   | TCTTTCCATTTACGCATCT       |
| <i>Igf-1</i>          | mouse    | Forward   | GCTTGCTCACCTTCACCAGC      |
|                       |          | Reverse   | AATGTACTIONCTTCTGAGTCT    |

**Supplementary Table 1** Primer sequence for realtime PCR analysis

# Supplementary Figure 1

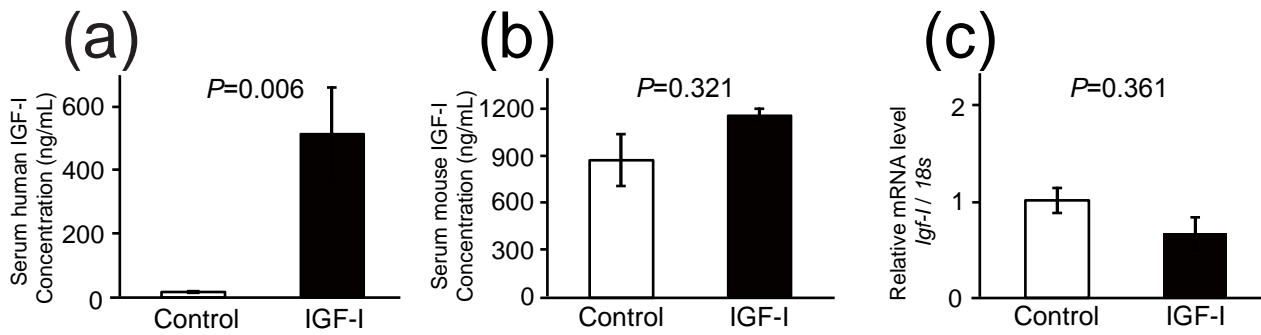

**Supplementary Figure 1** (a) Serum human IGF-I concentrations measured using human IGF-I-specific ELISA kit in NASH model mice. (b) Serum mouse IGF-I concentrations measured using mouse IGF-I-specific ELISA kit. (c) Quantitative realtime PCR analysis revealed no changes in mRNA expression of endogenous *Igf-1* in the liver. Data were compared by Student's *t* test.

# Supplementary Figure 2

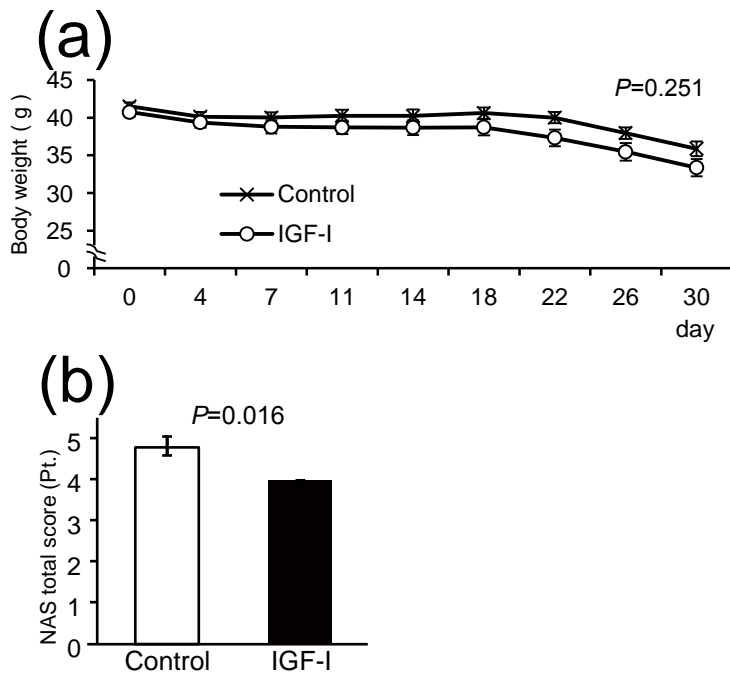

**Supplementary Figure 2** (a) Changes in the body weight during IGF-I treatment in the NASH model mice. Data were compared by MANOVA test. (b) Total NAFLD activity score (NAS) was evaluated by a blinded pathologists. NAS was assessed on a scale of 0-8, with higher scores indicating more severe disease; the components of this measure include steatosis (assessed on a scale of 0-3), lobular inflammation (assessed on a scale of 0-3), and hepatocellular ballooning (assessed on a scale of 0-3). SData were compared by tudent's *t* test,  $p < 0.05$ .

# Supplementary Figure 3

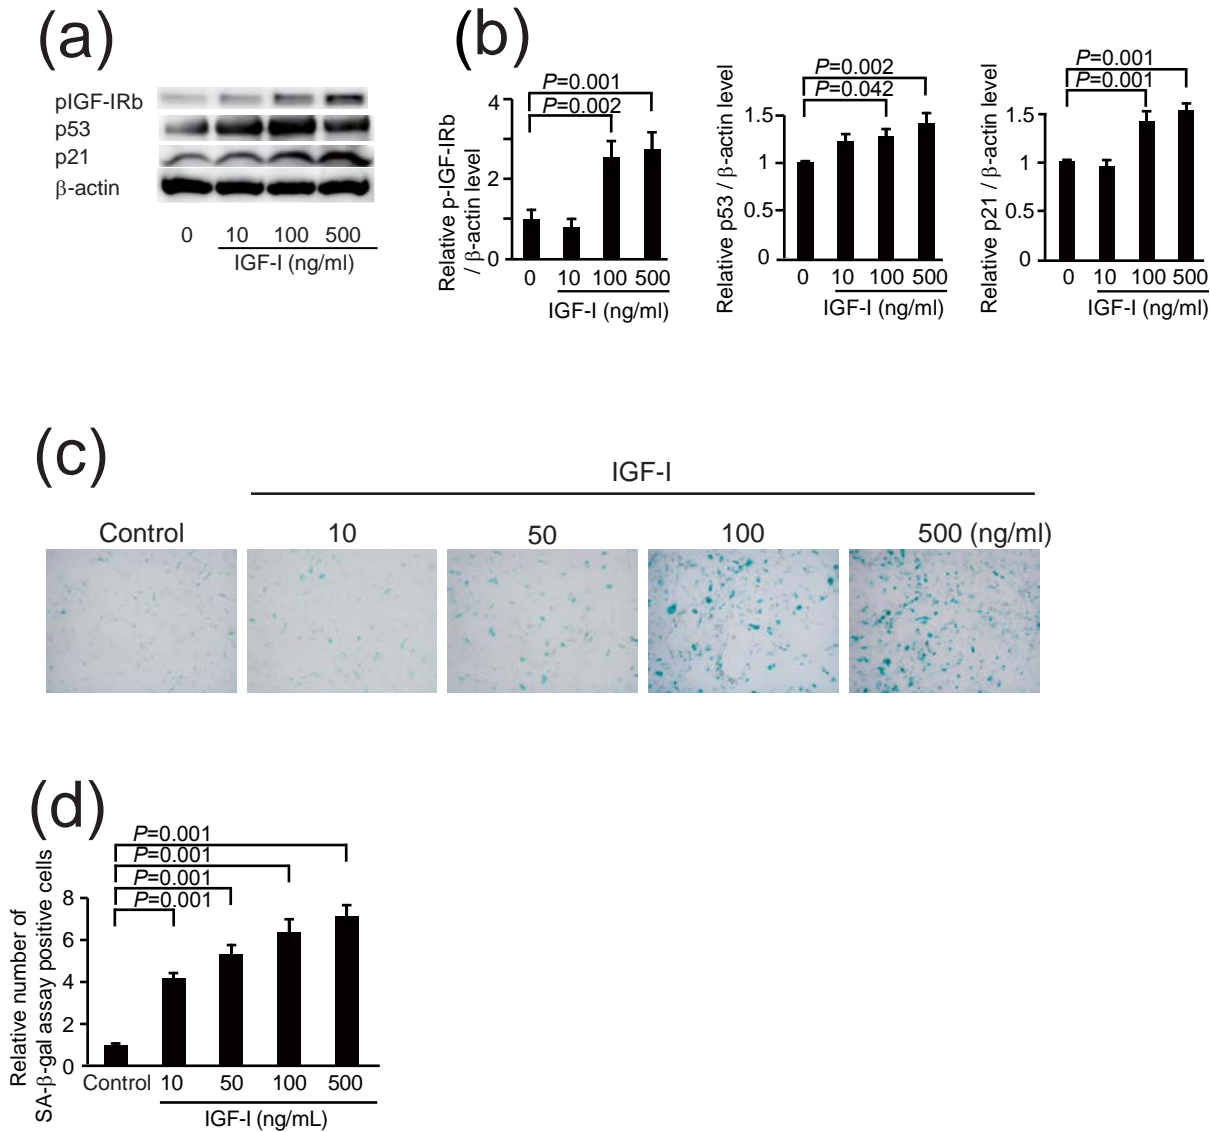

**Supplementary Figure 3** IGF-I induced cellular senescence in human hepatic stellate cell line, LX2 cells.

(a) IGF-I increased expressions of p53 and p21 proteins in a concentration-dependent manner. Cells were incubated with IGF-I for 72 h. (b) Quantitative analysis demonstrated that IGF-I significantly increased p53 and p21 protein expression and phosphorylation of the IGF-I receptor in a concentration-dependent manner. Densitometric analyses were performed using data from 5 independent experiments. Each value was normalized to that of  $\beta$ -actin. (c) IGF-I induced SA- $\beta$ -gal activation in LX2 cells. HSCs were incubated with IGF-I at the indicated concentrations for 5 days. (SA- $\beta$ -gal staining, 200 $\times$ ). (d) Quantitative analysis demonstrated that IGF-I significantly increased SA- $\beta$ -gal-positive cells in a concentration-dependent manner. Data were expressed as the mean  $\pm$  SEM of 20 random fields ( $n = 10$ ). Data were compared by Tukey's honestly significant difference test.
